# Supplementary material for: Patient-Reported Outcomes and Therapeutic Affordances of Social Media: Findings From a Global Online Survey of People With Chronic Pain
Source: PubMed Central journal article supplement (PMC4319091; doi:10.2196/jmir.3915), 2015-01-22

**Specific Things Done on SOCIAL NETWORK SITES for Chronic Pain Self-Management (N = 166)**

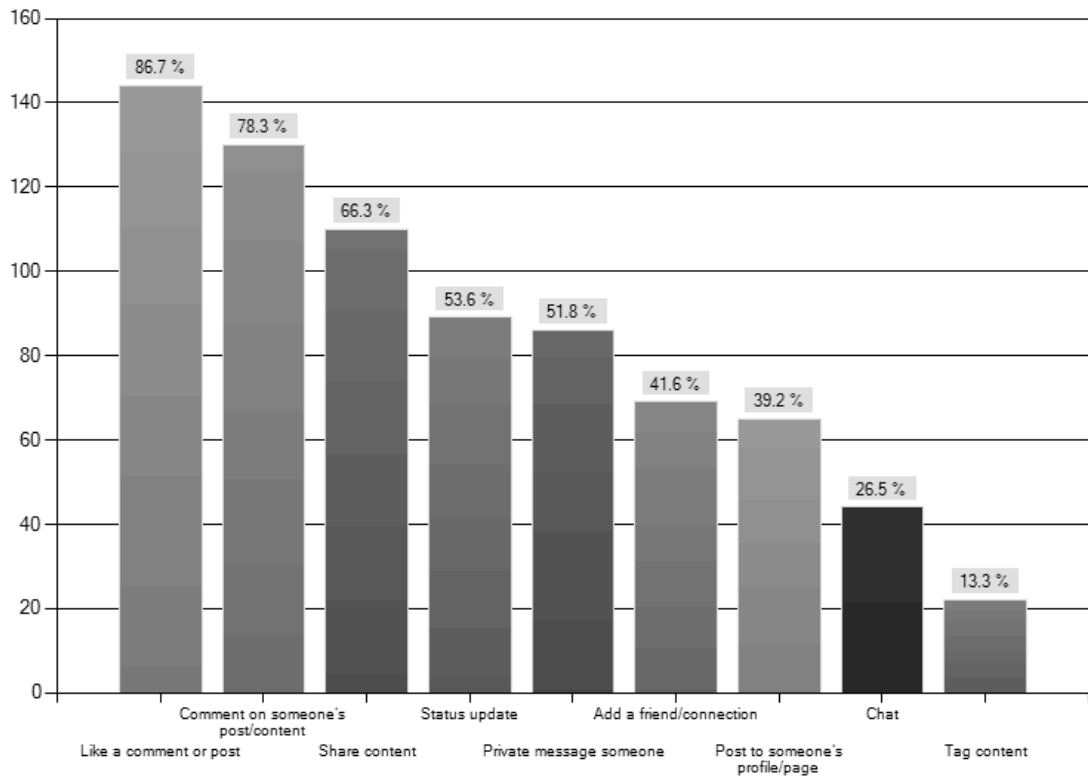

**Specific Things Done on DISCUSSION FORUMS/MESSAGE BOARDS for Chronic Pain Self Management (N = 82)**

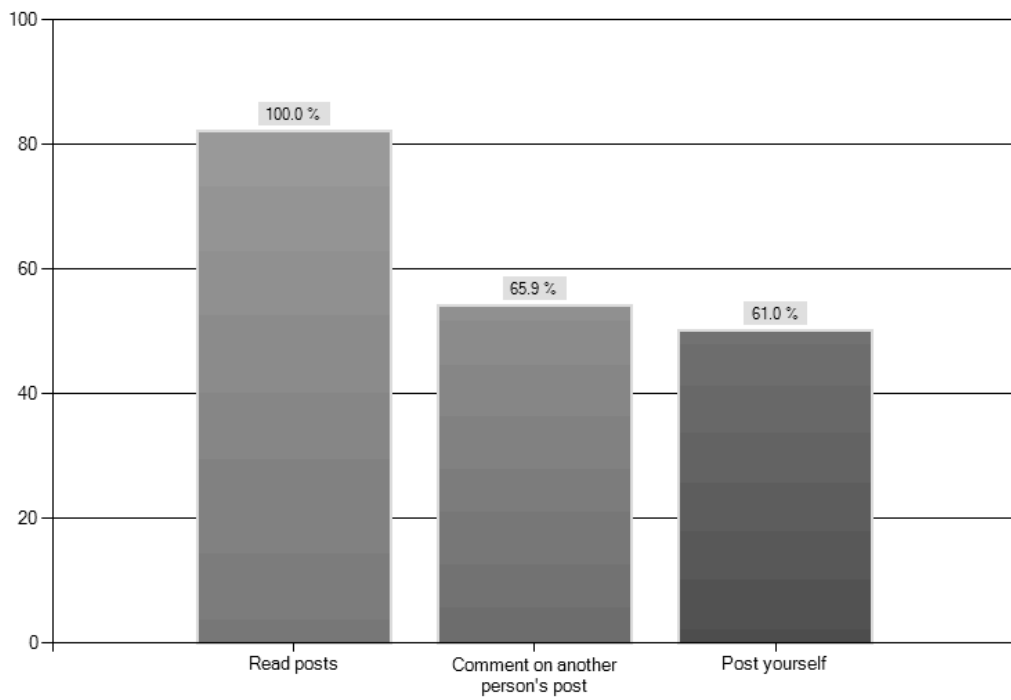

**Specific Things Done on BLOGS for Chronic Pain Self Management (N = 81)**

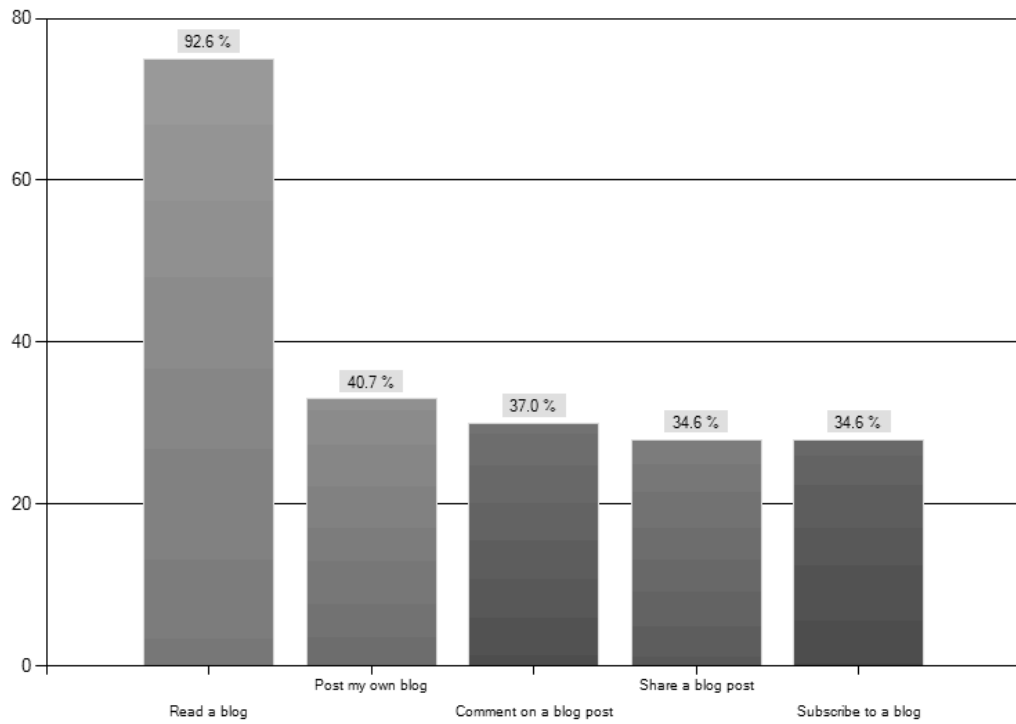

**Specific Things Done on Wikis for Chronic Pain Self Management (N = 62)**

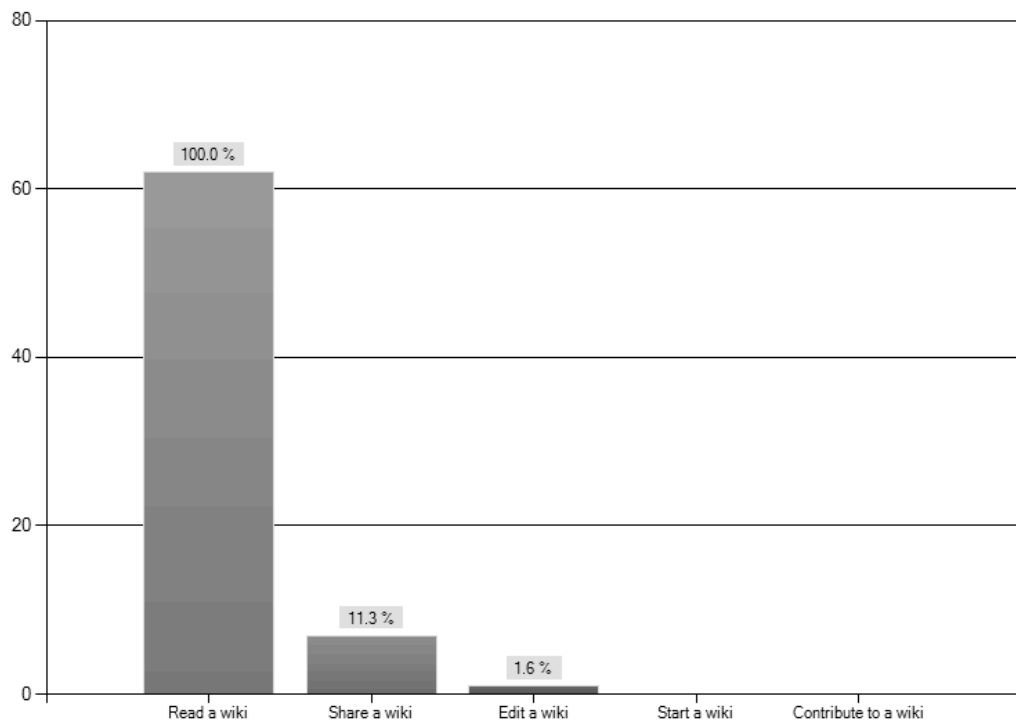

Specific Things Done on VIDEO SHARING SITES for Chronic Pain Self-Management (N = 55)

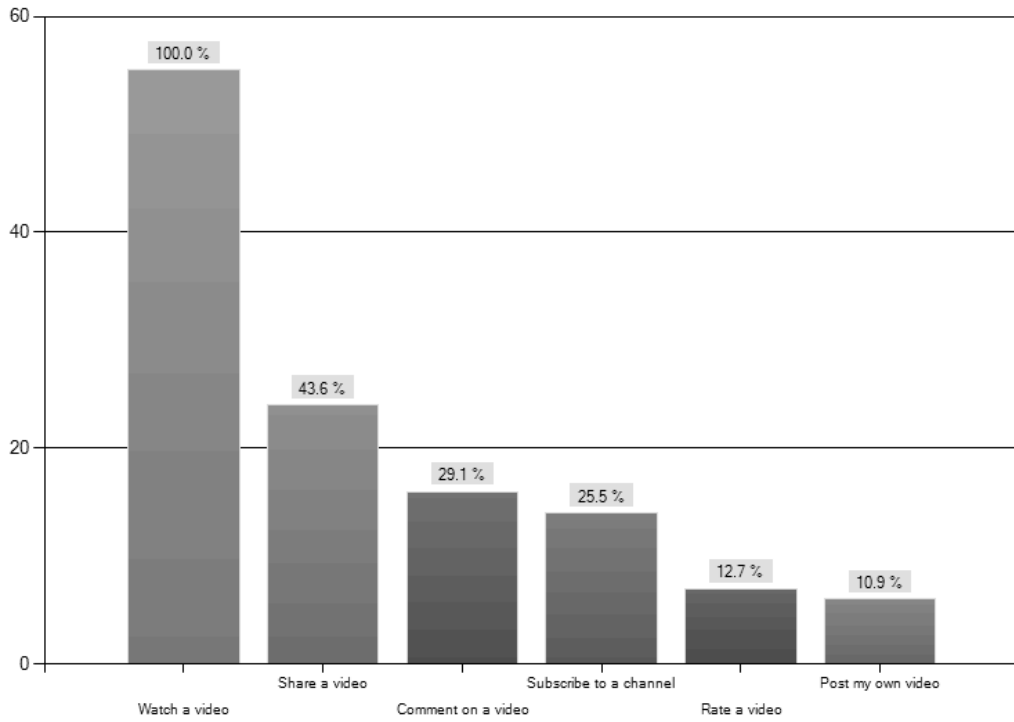

Specific Things Done on MICROBLOGS for Chronic Pain Self Management (N = 27)

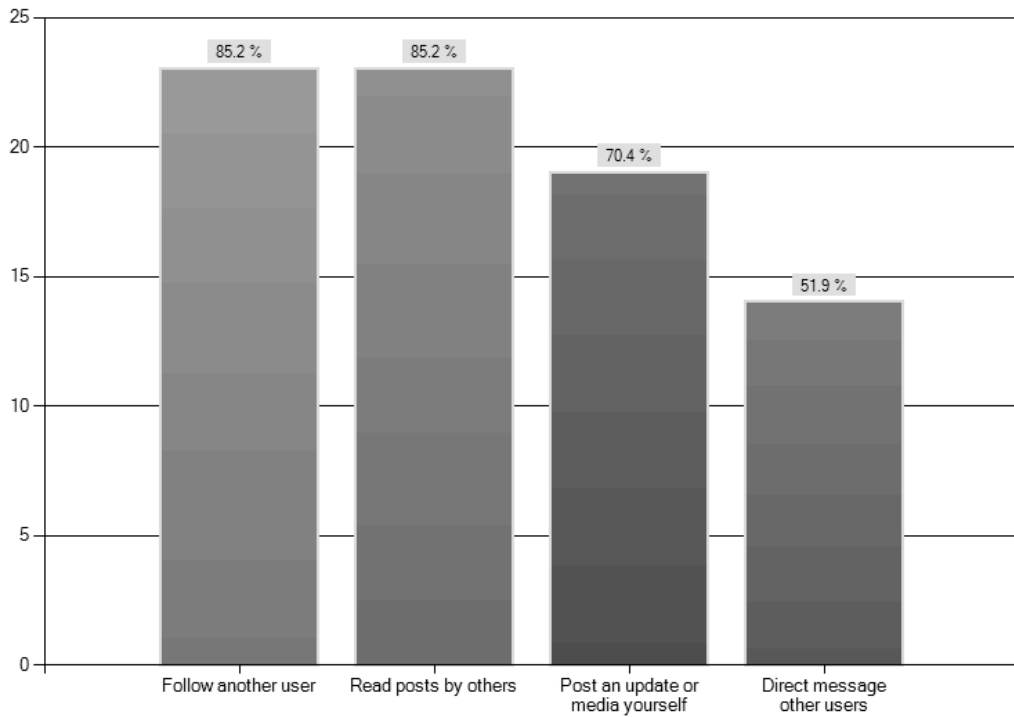

Supplement: jmir_v17i1e20_app2.pdf [file jmir_v17i1e20_app2.pdf]
