# Supplementary material for: Patient-Reported Outcomes and Therapeutic Affordances of Social Media: Findings From a Global Online Survey of People With Chronic Pain
Source: PubMed Central journal article supplement (PMC4319091; doi:10.2196/jmir.3915), 2015-01-22

### Q50 PROs - SNS

Answered: 173 Skipped: 58

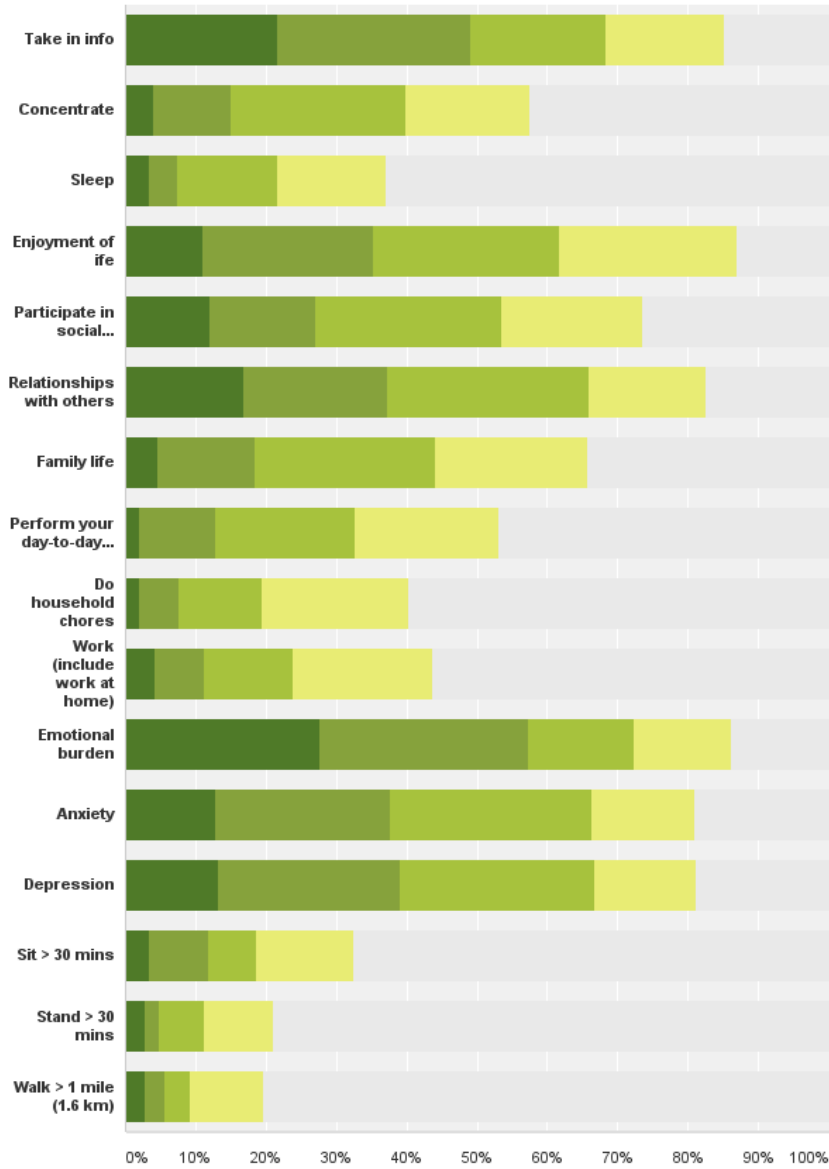

Very much Quite a bit Somewhat A little bit Not at all

### Q218 PROs - DF

Answered: 74 Skipped: 157

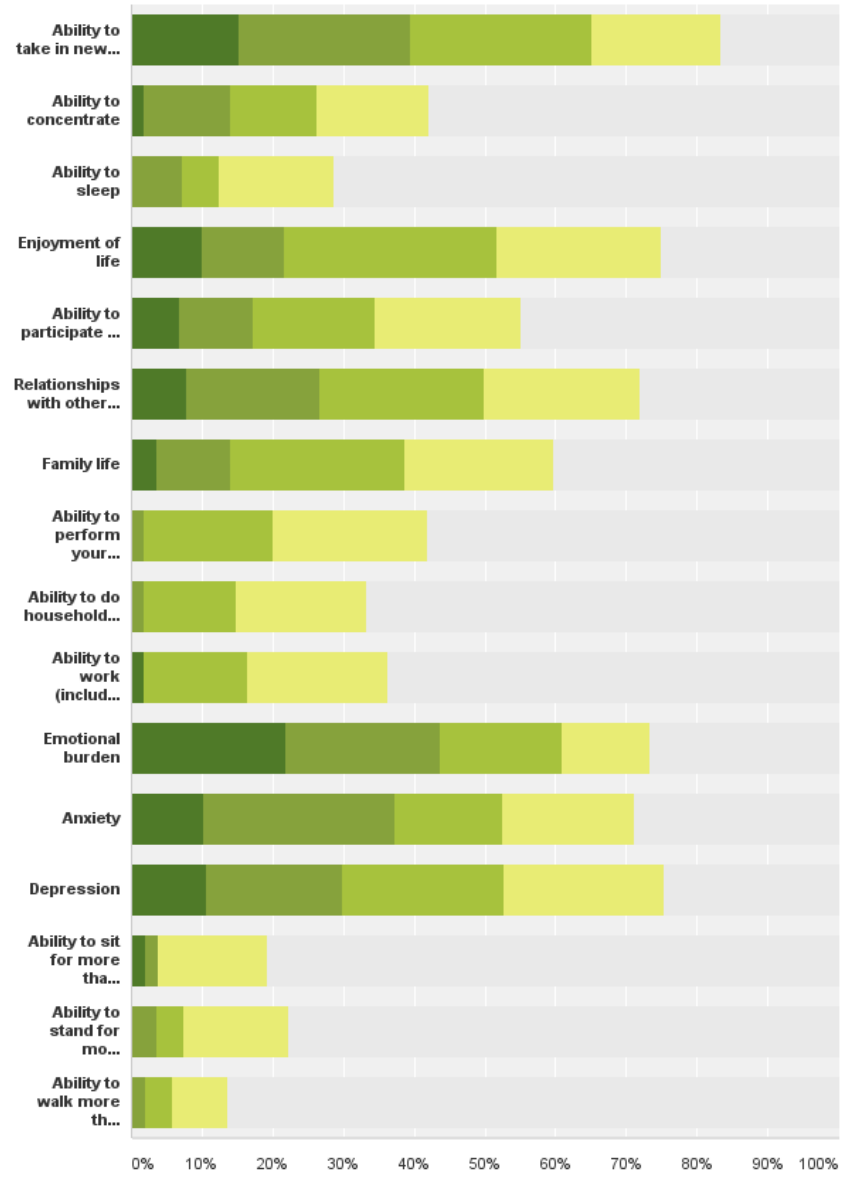

Very much Quite a bit Somewhat A little bit Not at all

### Q71 PROs - BLOGS

Answered: 73 Skipped: 158

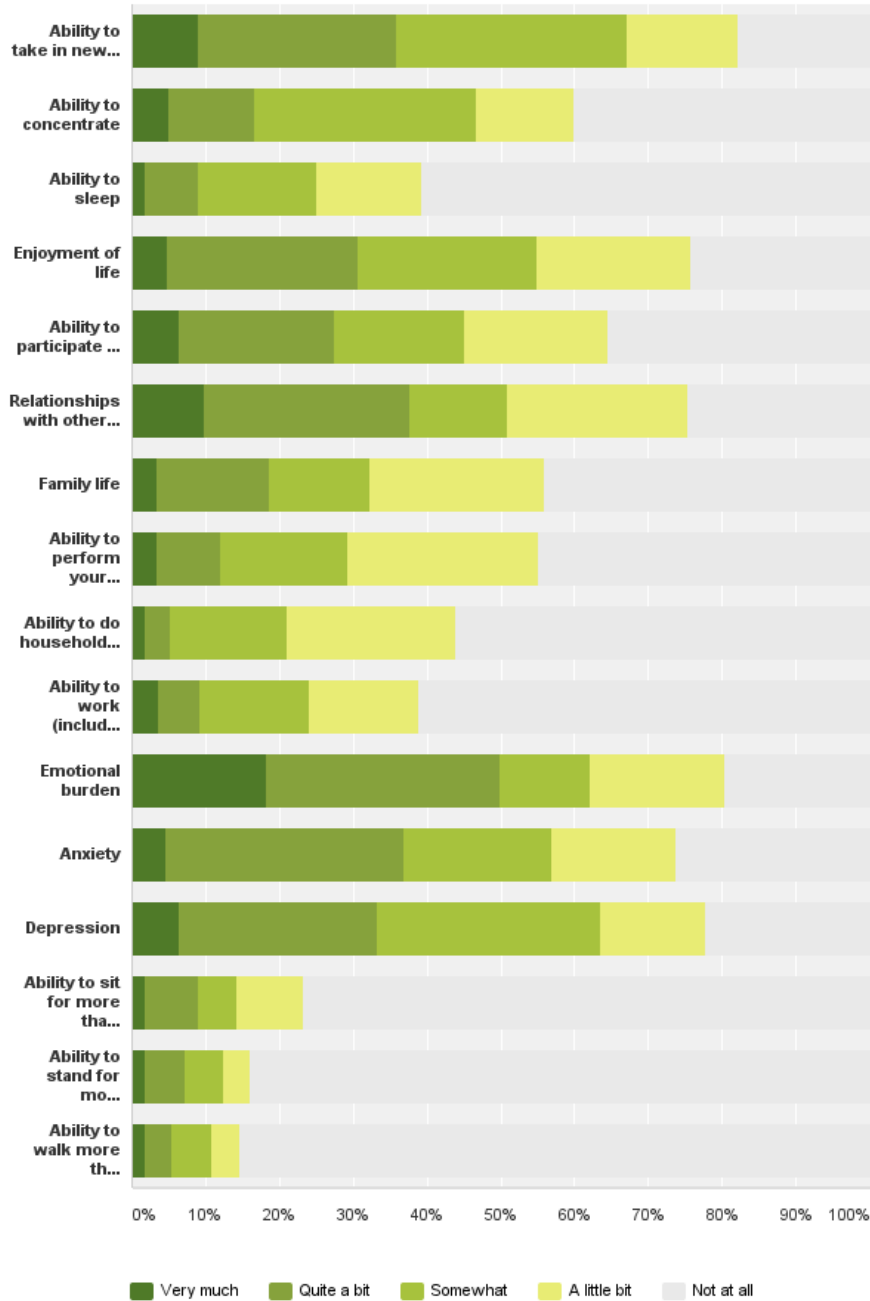

### Q92 PROs - WIKIS

Answered: 48 Skipped: 183

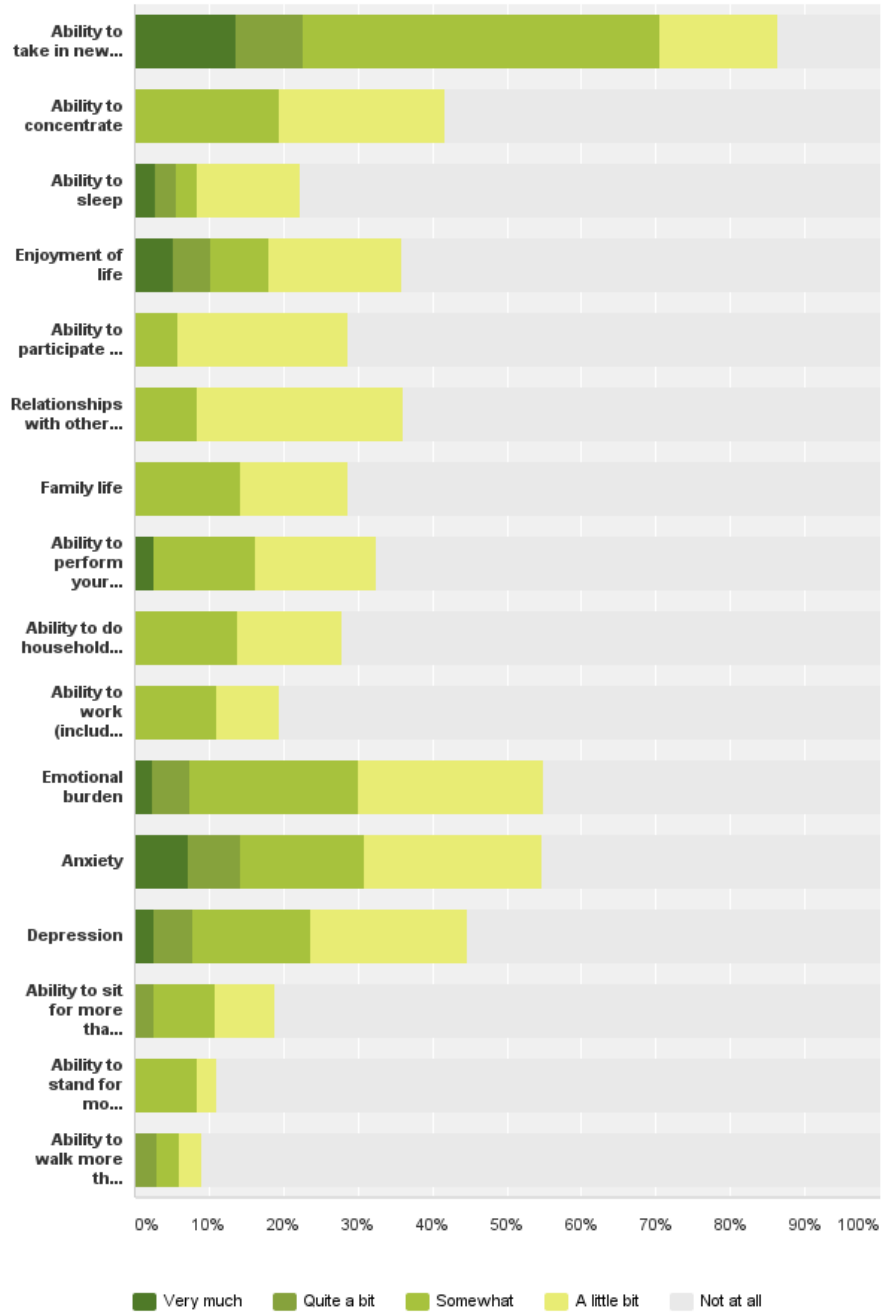

### Q176 PROs - VSS

Answered: 47 Skipped: 184

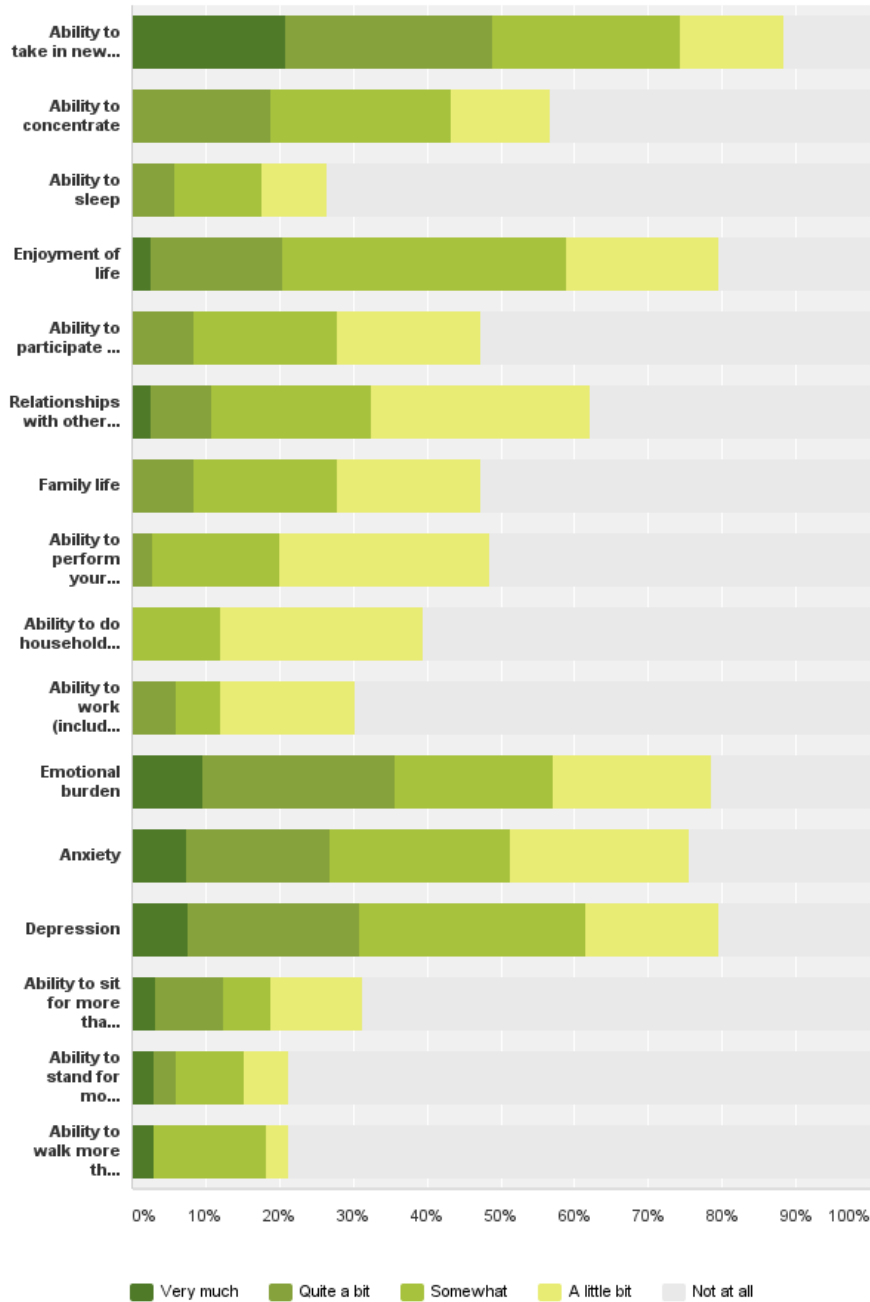

### Q113 PROs - MICROBLOGS

Answered: 22 Skipped: 209

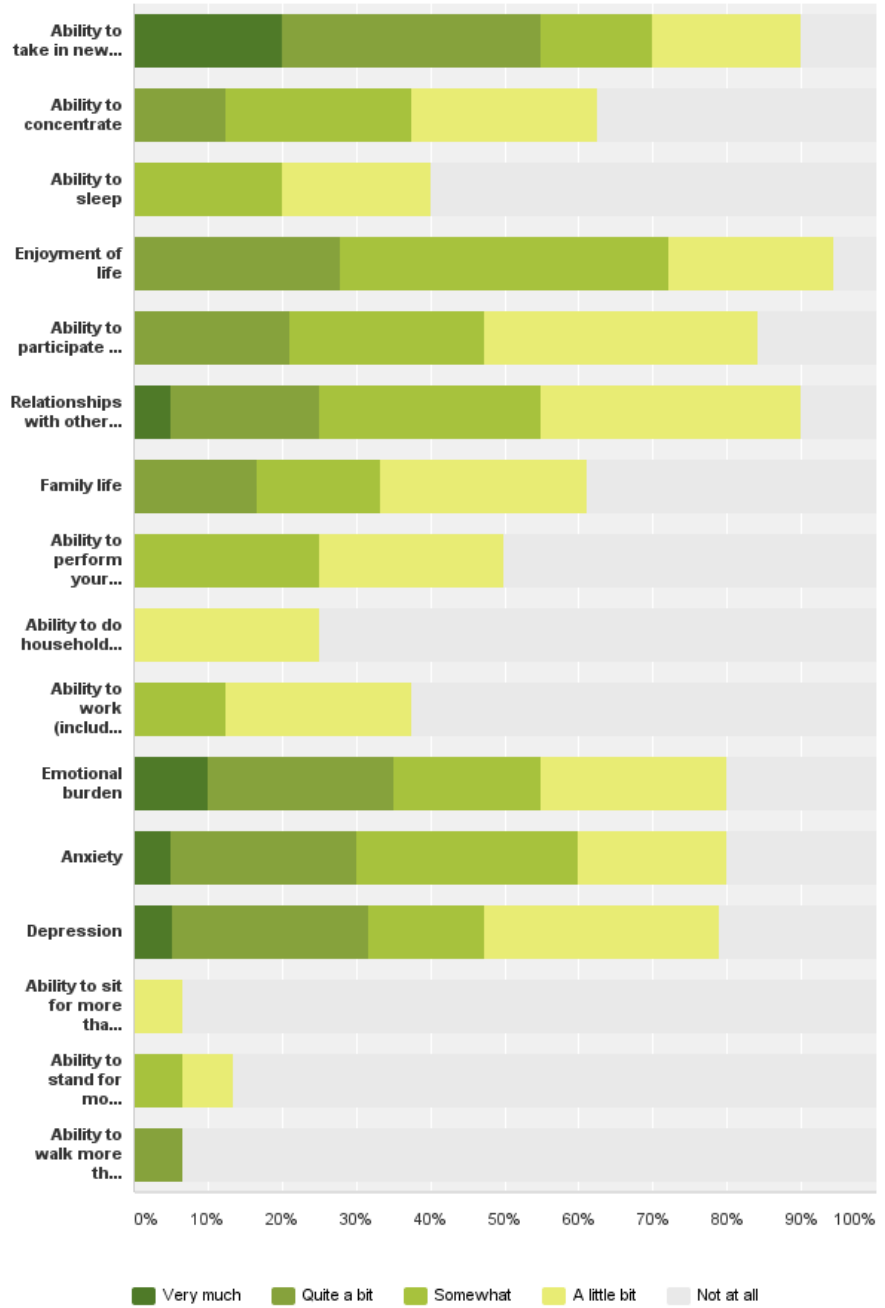

Supplement: jmir_v17i1e20_app3.pdf [file jmir_v17i1e20_app3.pdf]
