# Supplementary material for: Patient-Reported Outcomes and Therapeutic Affordances of Social Media: Findings From a Global Online Survey of People With Chronic Pain
Source: PubMed Central journal article supplement (PMC4319091; doi:10.2196/jmir.3915), 2015-01-22
Supplement: jmir_v17i1e20_app4.pdf [file jmir_v17i1e20_app4.pdf]

| SNS                | gamma/p | Enjoyment of | Enjoyment of | Participate in    | Participate in    | Relationships | Relationships | Family life |             | Emotional | Emotional | Anxiety |         | Depression |            |
|--------------------|---------|--------------|--------------|-------------------|-------------------|---------------|---------------|-------------|-------------|-----------|-----------|---------|---------|------------|------------|
|                    | value   | Life         | Life         | Social Activities | Social Activities | with others   | with others   | Family life | Family life | burden    | burden    | Anxiety | Anxiety | Depression | Depression |
| Gender             |         | 0.19         | 0.34         | 0.02              | 0.94              | 0.03          | 0.89          | 0.21        | 0.35        | 0.37      | 0.06      | 0.28    | 0.1     | 0.31       | 0.15       |
| Age                |         | 0.04         | 0.68         | 0.11              | 0.23              | 0.16          | 0.08          | 0.13        | 0.3         | 0.16      | 0.11      | 0.1     | 0.31    | 0.12       | 0.24       |
| Marital Status     |         | 0.07         | 0.58         | 0.05              | 0.71              | 0.21          | 0.1           | 0.01        | 0.58        | 0.04      | 0.75      | 0.03    | 0.78    | 0.07       | 0.57       |
| Education level    |         | 0.15         | 0.18         | 0.03              | 0.83              | 0.08          | 0.46          | 0.05        | 0.69        | 0.16      | 0.14      | 0.09    | 0.42    | 0.02       | 0.88       |
| Reason not working |         | 0.42         | 0.03         | 0.45              | 0.02              | 0.46          | 0.03          | 0.36        | 0.1         | 0.46      | 0.03      | 0.39    | 0.05    | 0.4        | 0.05       |
| Disease Diagnosed  |         | 0.1          | 0.49         | 0.08              | 0.55              | 0.1           | 0.47          | 0.07        | 0.62        | 0         | 1         | 0.07    | 0.62    | 0.09       | 0.5        |

| BLOGS              | gamma/p | Enjoyment of | Enjoyment of | Participate in    | Participate in    | Relationships | Relationships | Family life |             | Emotional | Emotional | Anxiety |         | Depression |            |
|--------------------|---------|--------------|--------------|-------------------|-------------------|---------------|---------------|-------------|-------------|-----------|-----------|---------|---------|------------|------------|
|                    | value   | Life         | Life         | Social Activities | Social Activities | with others   | with others   | Family life | Family life | burden    | burden    | Anxiety | Anxiety | Depression | Depression |
| Gender             |         | 0.17         | 0.71         | 0.36              | 0.39              | 0.12          | 0.87          | 0.15        | 0.82        | 0.44      | 0.45      | 0.3     | 0.61    | 0.64       | 0.15       |
| Age                |         | 0.04         | 0.83         | 0.11              | 0.52              | 0.03          | 0.89          | 0.1         | 0.6         | 0.37      | 0.02      | 0.18    | 0.25    | 0.17       | 0.24       |
| Marital Status     |         | 0.06         | 0.76         | 0.19              | 0.35              | 0.14          | 0.48          | 0.18        | 0.4         | 0.12      | 0.54      | 0.04    | 0.85    | 0          | 1          |
| Education level    |         | 0.19         | 0.27         | 0.07              | 0.73              | 0.13          | 0.49          | 0.49        | 0.01        | 0.08      | 0.66      | 0.28    | 0.09    | 0.3        | 0.07       |
| Reason not working |         | 0.55         | 0.06         | 0.62              | 0.06              | 0.63          | 0.1           | 0.67        | 0.13        | 0.67      | 0.01      | 0.63    | 0.02    | 0.56       | 0.04       |
| Disease Diagnosed  |         | 0.26         | 0.37         | 0.29              | 0.31              | 0             | 1             | 0.44        | 0.21        | 0.29      | 0.24      | 0.34    | 0.14    | 0.05       | 0.81       |

| DF                 | gamma/p | Enjoyment of | Enjoyment of | Participate in    | Participate in    | Relationships | Relationships | Family life |             | Emotional | Emotional | Anxiety |         | Depression |            |
|--------------------|---------|--------------|--------------|-------------------|-------------------|---------------|---------------|-------------|-------------|-----------|-----------|---------|---------|------------|------------|
|                    | value   | Life         | Life         | Social Activities | Social Activities | with others   | with others   | Family life | Family life | burden    | burden    | Anxiety | Anxiety | Depression | Depression |
| Gender             |         | 0.19         | 0.59         | 1                 | 0.04              | 0.66          | 0.07          | 1           | 0.04        | 0.19      | 0.68      | 0.11    | 0.83    | 0.17       | 0.74       |
| Age                |         | 0.02         | 0.92         | 0.08              | 0.64              | 0.25          | 0.08          | 0.03        | 0.85        | 0.3       | 0.05      | 0.21    | 0.19    | 0.3        | 0.07       |
| Marital Status     |         | 0.33         | 0.13         | 0.39              | 0.1               | 0.48          | 0.02          | 0.06        | 0.8         | 0.42      | 0.02      | 0.2     | 0.39    | 0.28       | 0.19       |
| Education level    |         | 0.12         | 0.49         | 0.12              | 0.55              | 0.19          | 0.27          | 0.24        | 0.19        | 0.07      | 0.71      | 0.18    | 0.32    | 0.03       | 0.85       |
| Reason not working |         | 0.54         | 0.24         | 0.67              | 0.22              | 0.33          | 0.38          | 0.78        | 0.09        | 0.37      | 0.38      | 0.44    | 0.29    | 0.56       | 0.2        |
| Disease Diagnosed  |         | 0.18         | 0.47         | 0.38              | 0.2               | 0.31          | 0.13          | 0.24        | 0.39        | 0.27      | 0.18      | 0.17    | 0.44    | 0.28       | 0.15       |
